# Supplementary material for: Emission ensemble approach to improve the development of multi-scale emission inventories
Source: Copernicus journal article supplement (doi:10.5194/egusphere-2023-1257), 2023-08-28
Supplement: Supplementary file 1 [file egusphere-2023-1257-supplement.pdf]

1 Supplementary material

2

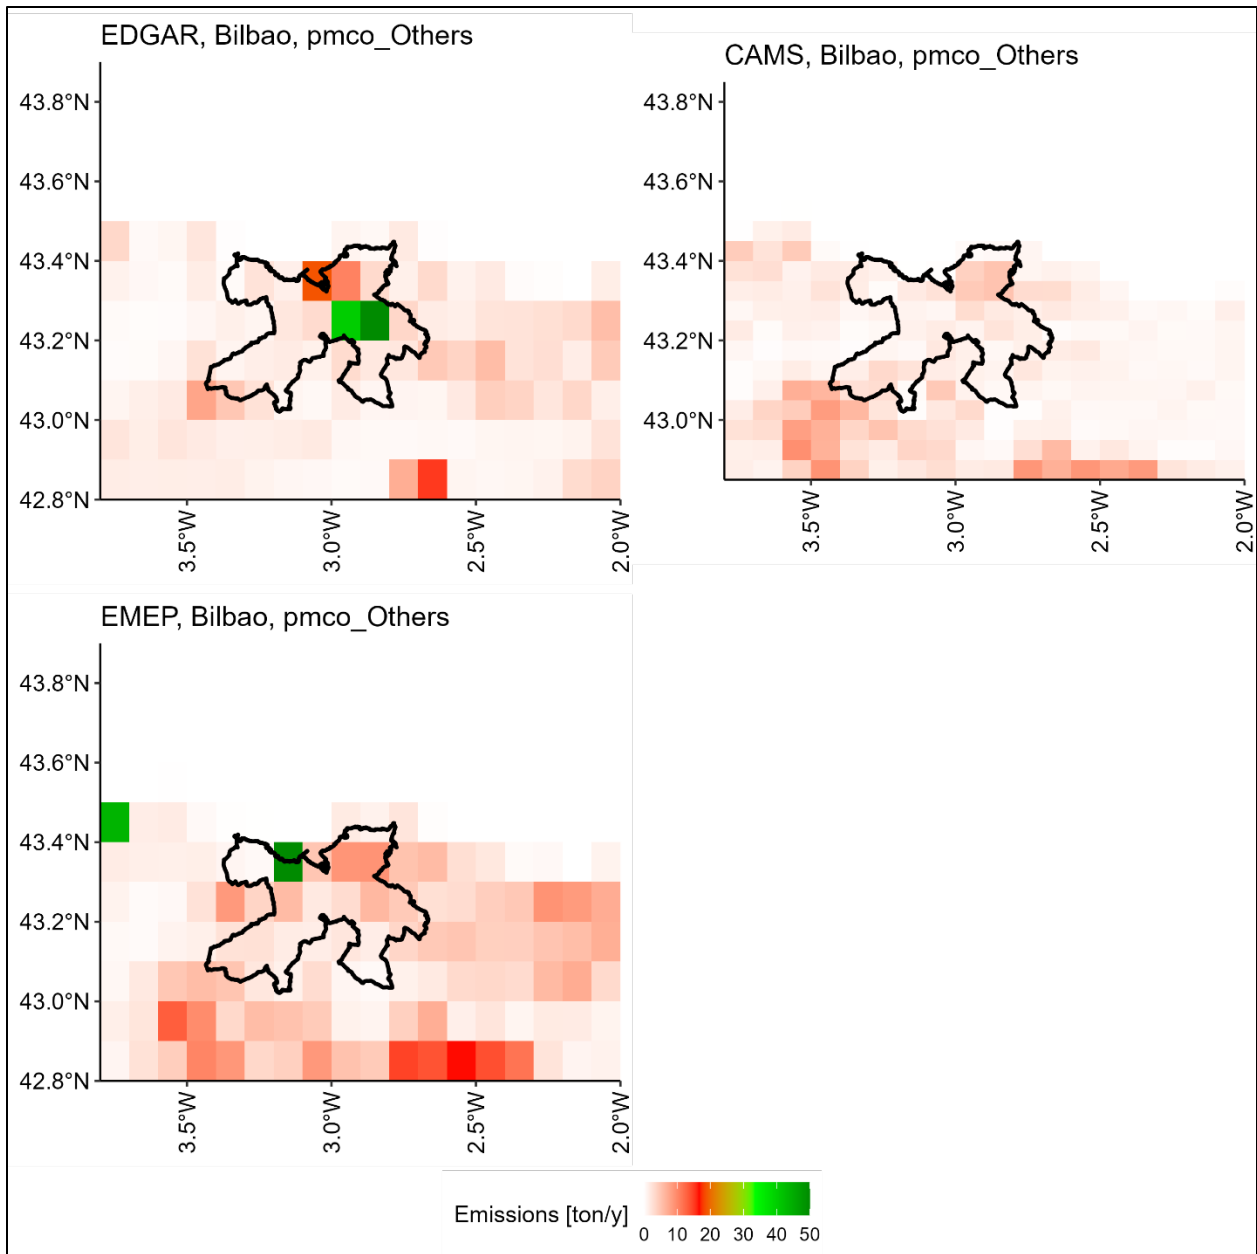

3  
4

Figure S1: PMco emissions for the "other" sector in Bilbao. The dark line indicates the shape of the functional urban area.

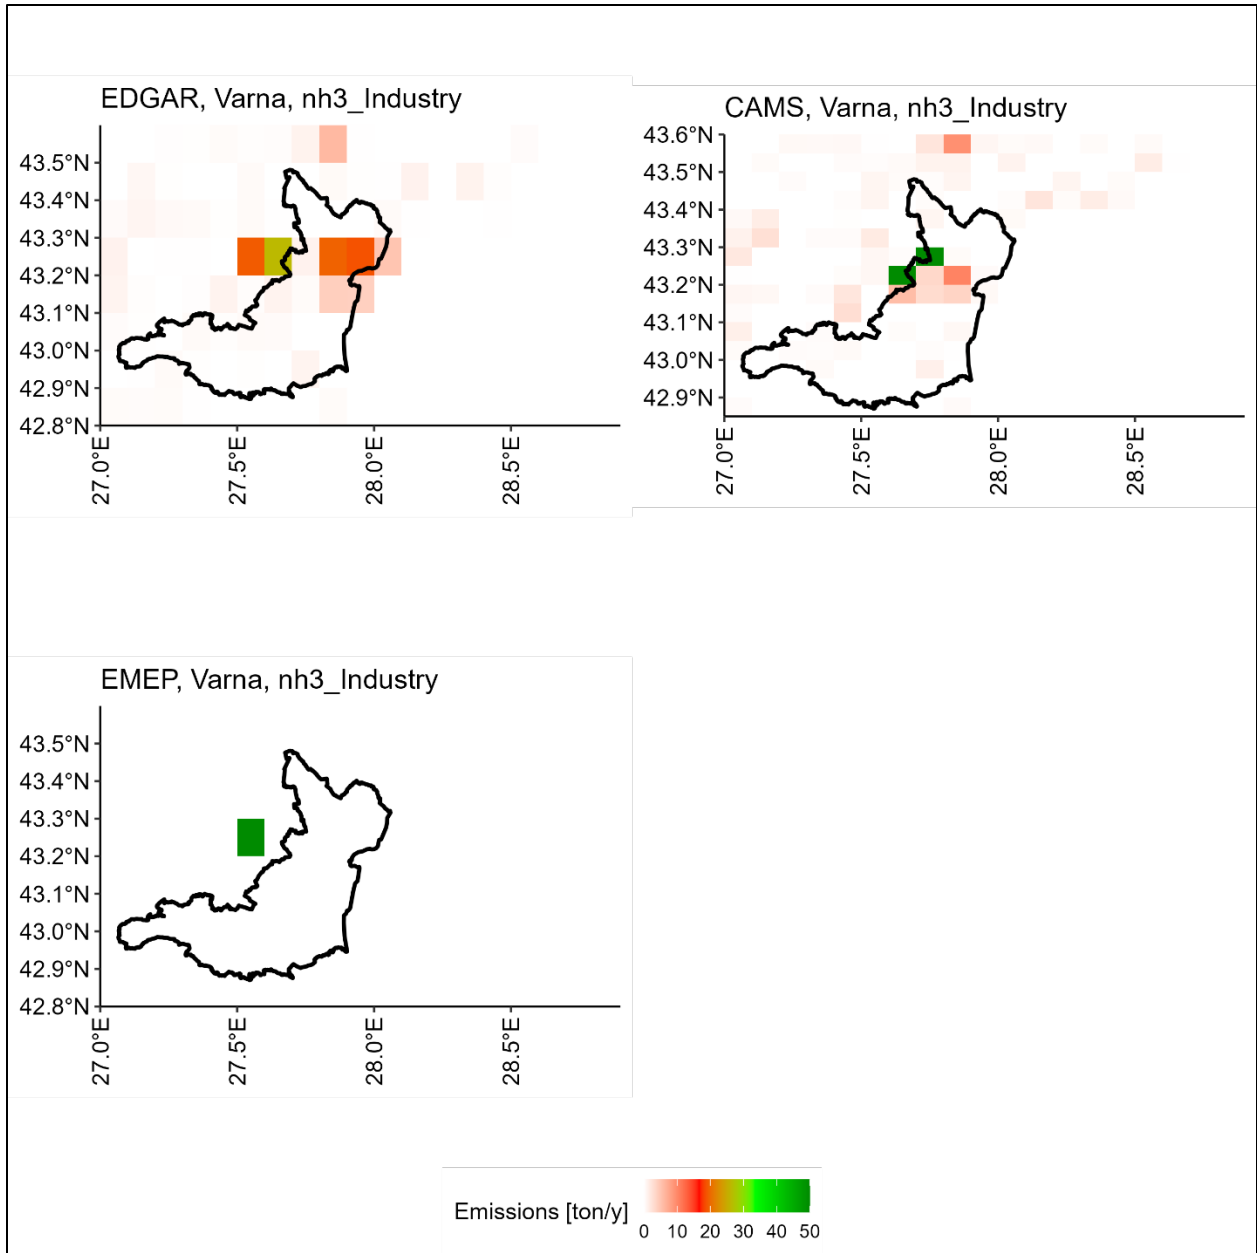

5  
6  
7

Figure S2: NH3 emissions Industry for Varna. The dark line indicates the shape of the functional urban area .

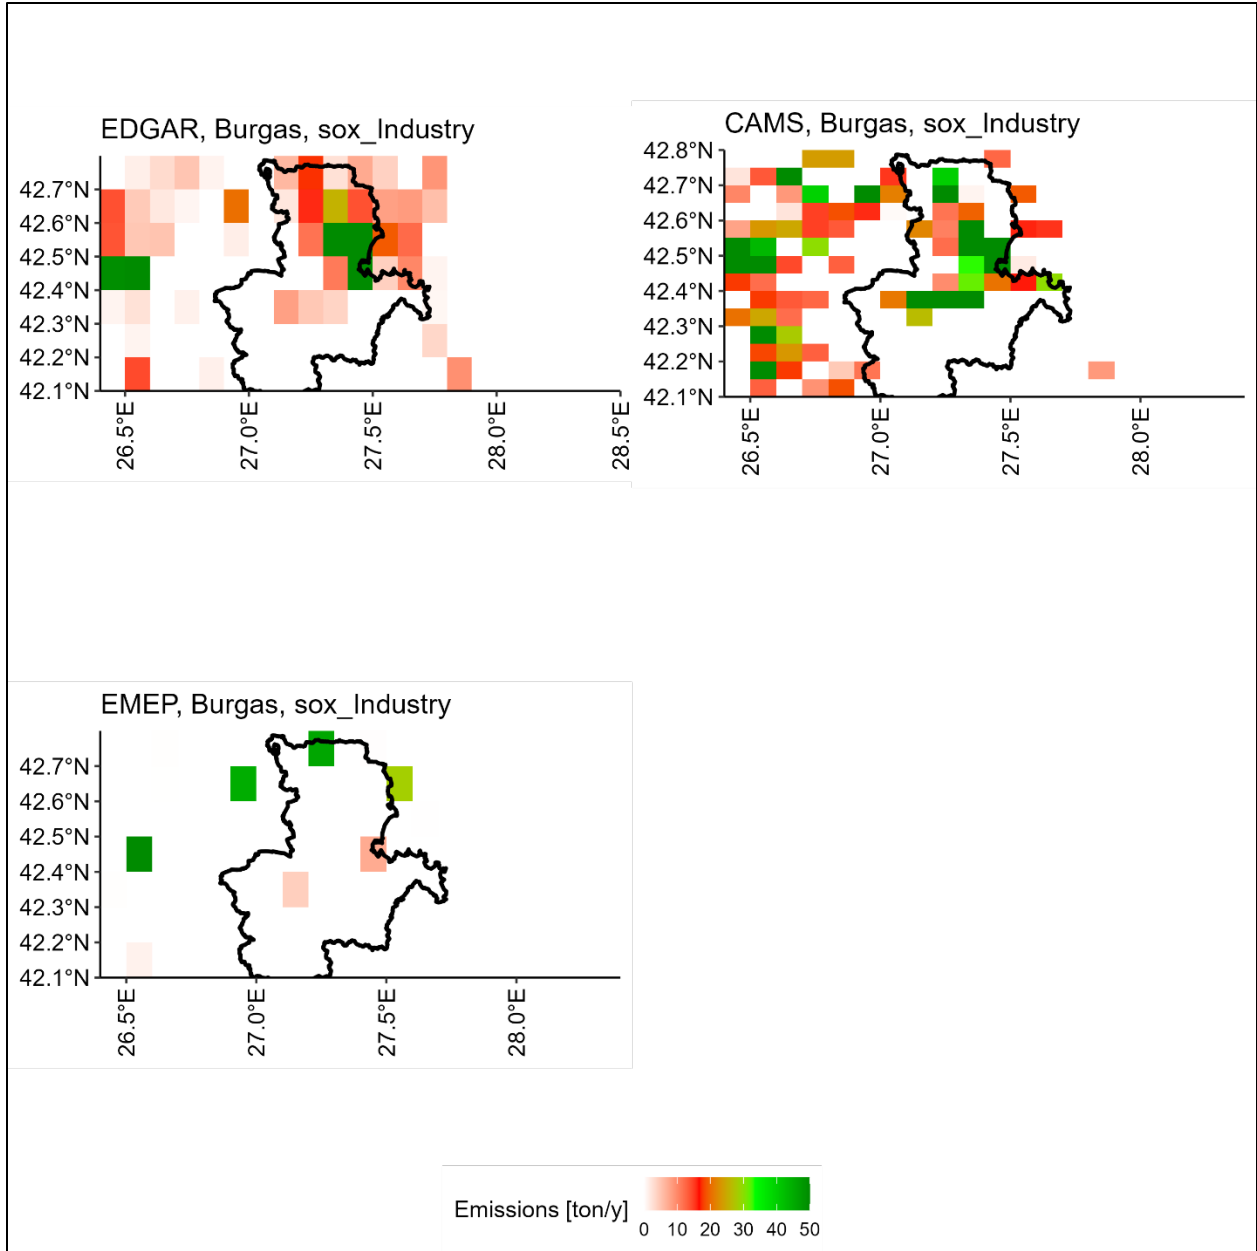

Figure S3: SO2 emissions Industry Burgas (ES). The dark line indicates the shape of the functional urban area.

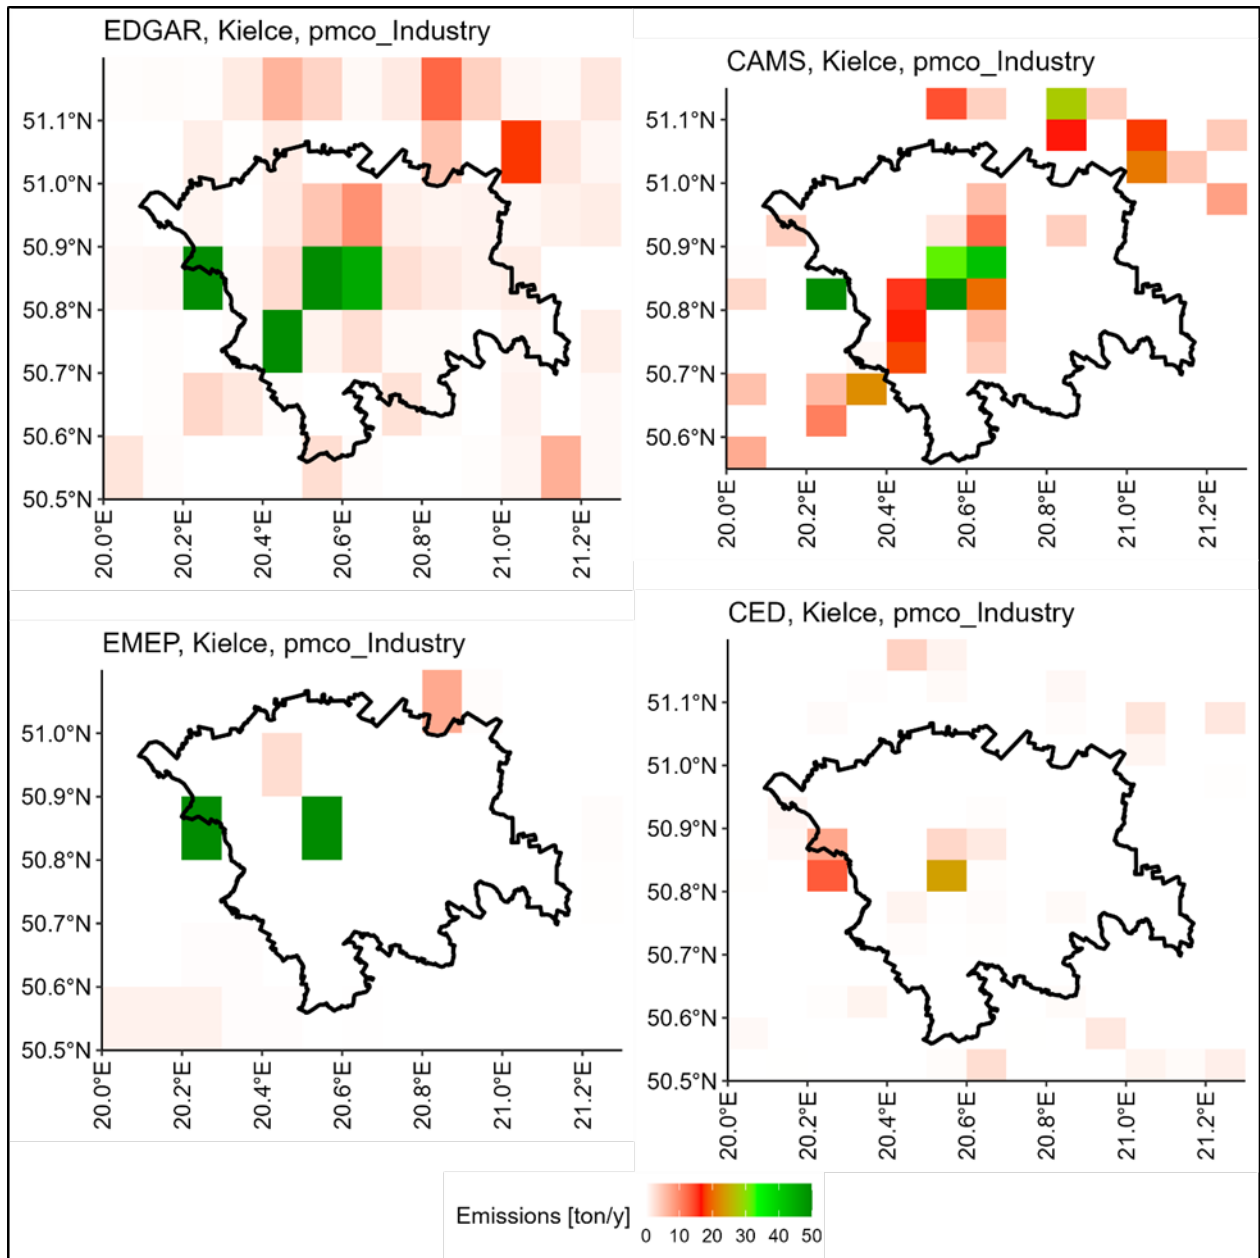

10

11

Figure S4: PMco emissions for the industry sector in Kielce. The dark line indicates the shape of the functional urban area.

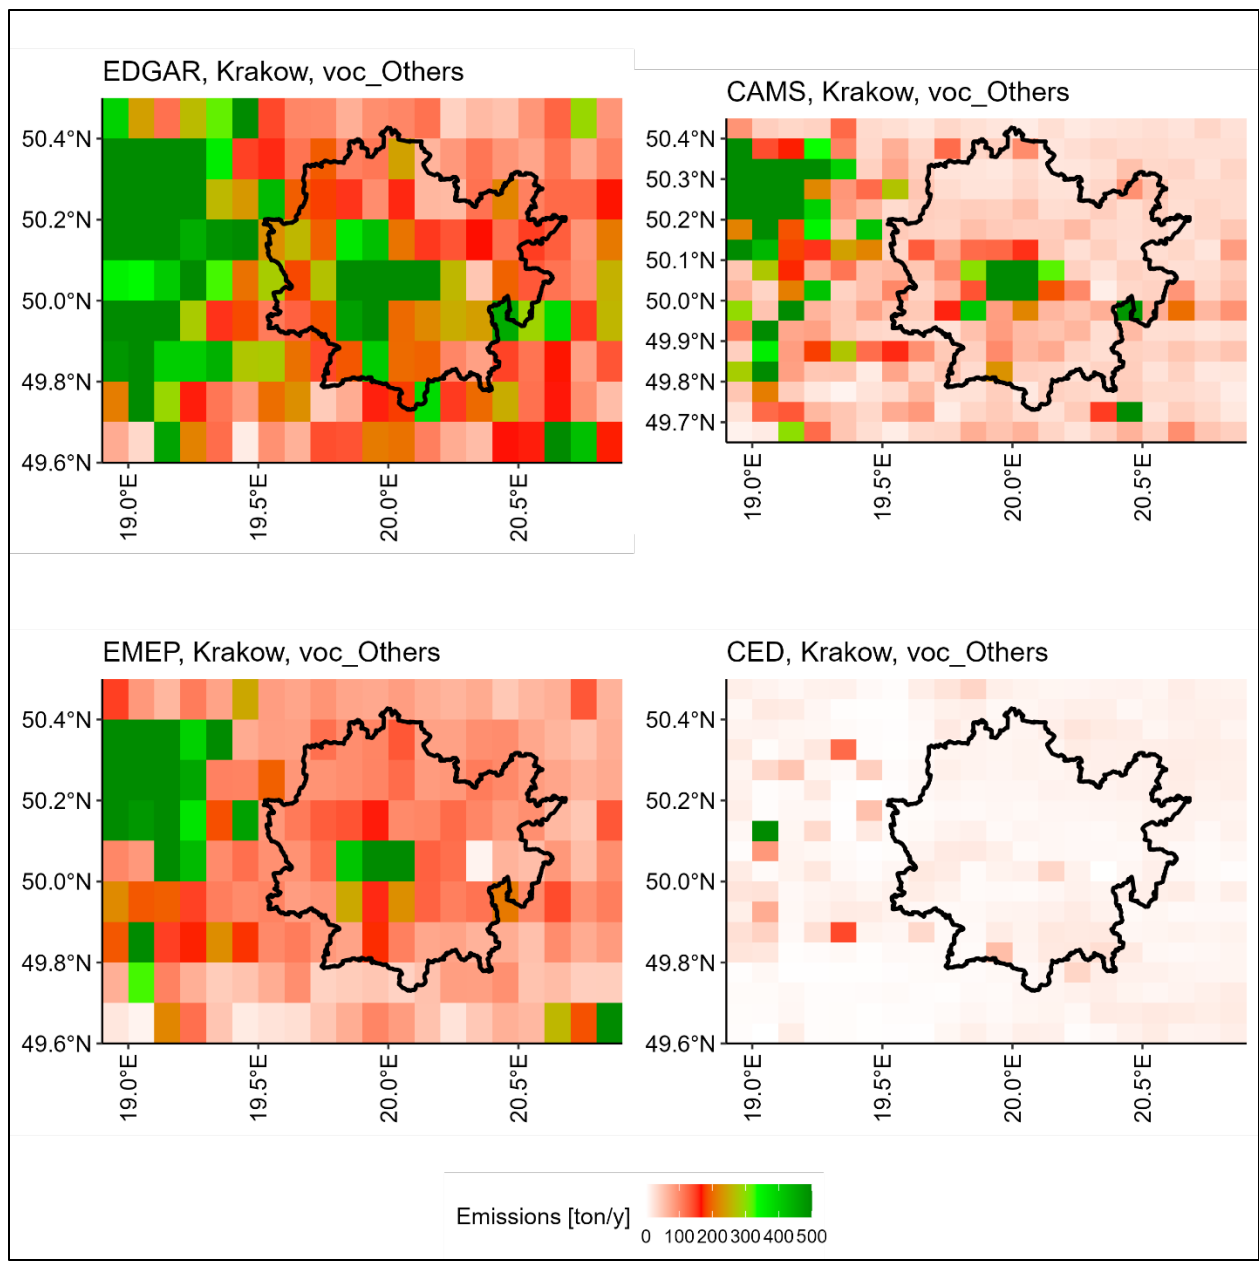

12  
13  
14

Figure S5: VOC emissions for the "other" sector in Krakow. The dark line indicates the shape of the functional urban area.

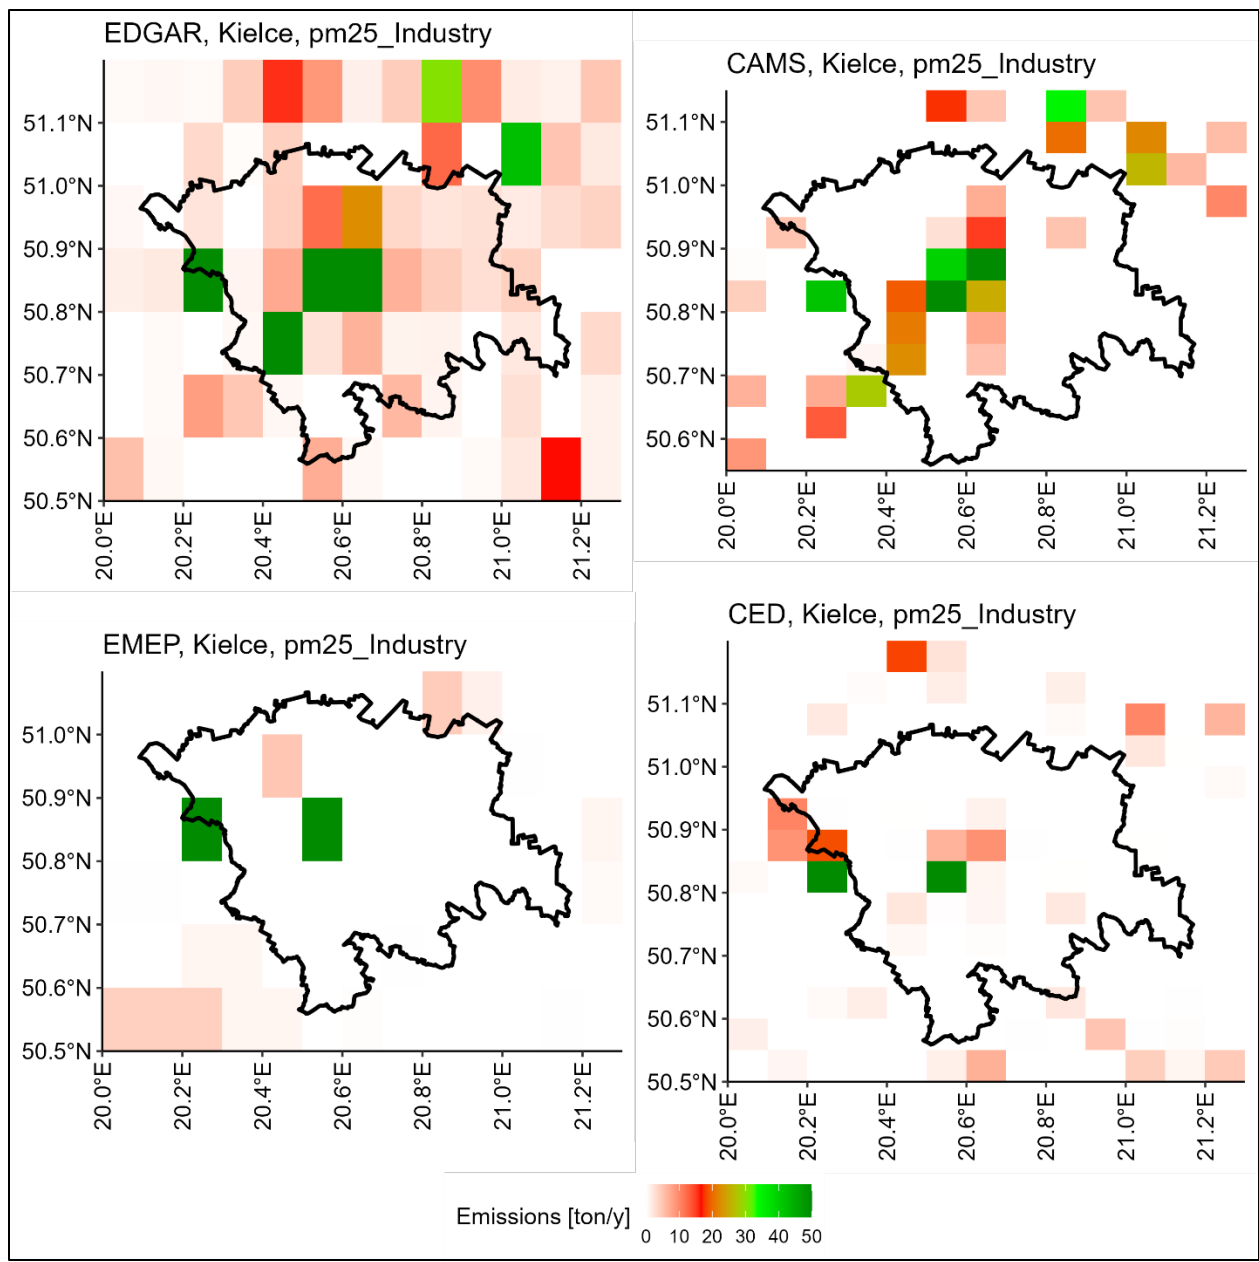

Figure S6: PM25 emissions from the industry sector in Kielce. The dark line indicates the shape of the functional urban area.

15  
16  
17

18

| <b>. GNFR</b>                                    | <b>SNAP</b>          | <b>CED</b>                                                      |
|--------------------------------------------------|----------------------|-----------------------------------------------------------------|
| A_PublicPower                                    | SNAP01               | Emission from NB named as SNAP1                                 |
| B_Industry                                       | SNAP03 and<br>SNAP04 | Emission from NB named as SNAP3 and<br>SNAP4                    |
| I_Offroad                                        | Part of<br>SNAP08    | Emission from agricultural tractors                             |
| F_RoadTransport                                  | SNAP07               | Emission from road transport                                    |
| C_OtherStationaryComb                            | SNAP02               | Emission from residential heating                               |
| D_Fugitive                                       | SNAP05               | Emission from heap and excavation and from<br>NB named as SNAP5 |
| E_Solvents                                       | SNAP06               | Emission from NB named as SNAP6                                 |
| K_AgriLivestock i L_AgriOther as<br>one GNFR K+L | SNAP10               | Emission from agriculture and livestock                         |
| J_Waste                                          | SNAP09               | Emission from landfills and from NB named<br>as SNAP5           |

19

*Table S1: Translation from SNAP to GNFR applied in CED*

20

21

|                | NMVOC                 |                        | NH3    |        | NOx                |                    | PM10                 |                      | PM25                 |                      | SO2                  |                      |
|----------------|-----------------------|------------------------|--------|--------|--------------------|--------------------|----------------------|----------------------|----------------------|----------------------|----------------------|----------------------|
|                | CED                   | EMEP                   | CED    | EMEP   | CED                | EMEP               | CED                  | EMEP                 | CED                  | EMEP                 | CED                  | EMEP                 |
| <b>GNFR A</b>  | 0.28 <sup>1)</sup>    | 2.68 <sup>1)</sup>     | 0.13   | 0.00   | 115.91             | 135.09             | 8.27                 | 5.96                 | 5.60                 | 3.21                 | 126.29 <sup>1)</sup> | 193.17 <sup>1)</sup> |
| <b>GNFR B</b>  | 17.76 <sup>2)</sup>   | 107.75 <sup>2)</sup>   | 5.98   | 4.25   | 69.30              | 74.70              | 12.06 <sup>2)</sup>  | 59.99 <sup>2)</sup>  | 8.89                 | 34.69                | 45.23 <sup>2)</sup>  | 107.83 <sup>2)</sup> |
| <b>GNFR C</b>  | 201.71                | 101.83                 | -      | 8.31   | 50.55              | 73.69              | 190.66 <sup>5)</sup> | 88.51 <sup>5)</sup>  | 187.02 <sup>5)</sup> | 59.12 <sup>5)</sup>  | 113.10               | 115.26               |
| <b>GNFR D</b>  | 1.50 <sup>3)</sup>    | 79.17 <sup>3)</sup>    | -      | 0.06   | 0.32 <sup>3)</sup> | 3.58 <sup>3)</sup> | 19.44                | 9.58                 | 4.81                 | 1.64                 | 0.16 <sup>3)</sup>   | 7.52 <sup>3)</sup>   |
| <b>GNFR E</b>  | 13.98 <sup>3,4)</sup> | 164.11 <sup>3,4)</sup> | 0.14   | 0.15   | 0.00               | 0.06               | 0.02 <sup>3)</sup>   | 0.93 <sup>3)</sup>   | 0.021 <sup>1)</sup>  | 0.93 <sup>1)</sup>   | 0.00                 | 0.68                 |
| <b>GNFR F</b>  | 74.98                 | 75.52                  | 2.93   | 2.95   | 274.00             | 273.50             | 18.10                | 18.06                | 13.57                | 13.54                | 0.54                 | 0.58                 |
| <b>GNFR G</b>  | 0.00                  | 0.01                   | 0.00   | 0.05   | 0.00               | 4.03               | 0.00                 | 0.15                 | 0.00                 | 0.15                 | 0.00                 | 0.20                 |
| <b>GNFR H</b>  | 0.03                  | 0.08                   | 0.00   | 0.00   | 0.66               | 1.85               | 0.00                 | 0.01                 | 0.00                 | 0.01                 | 0.05                 | 0.15                 |
| <b>GNFR I</b>  | 3.30                  | 4.12                   | 0.02   | 0.02   | 35.56              | 46.01              | 1.48                 | 1.69                 | 1.47                 | 1.67                 | 0.05                 | 0.15                 |
| <b>GNFR J</b>  | 0.77 <sup>2,3)</sup>  | 6.31 <sup>2,3)</sup>   | 0.27   | 0.89   | 1.33               | 1.97               | 0.51 <sup>2,3)</sup> | 4.47 <sup>2,3)</sup> | 0.47 <sup>2,3)</sup> | 5.73 <sup>2,3)</sup> | 0.18                 | 0.26                 |
| <b>GNFR KL</b> | 105.97                | 105.96                 | 303.43 | 300.14 | 69.91              | 69.22              | 29.87                | 29.48                | 3.32                 | 3.29                 | 0.00                 | 0.01                 |
|                |                       |                        |        |        |                    |                    |                      |                      |                      |                      |                      |                      |
| <b>SUM</b>     | 420.27                | 647.53                 | 312.91 | 316.84 | 617.54             | 683.74             | 280.41               | 218.83               | 225.17               | 123.97               | 285.59               | 425.82               |

22

23

24 *Table S2: Country totals for CED and EMEP data (biggest differences are underlined and commented below).*

25 *1) NB users are not obligated to report all pollutants (NMVOC can be omitted) in this sector. For EMEP reporting, the missing*  
26 *emission values are estimated using official emission factors (EMEP/EEA air pollutant emission), which depend on basic activity*  
27 *data (Tier 1 – fuel consumption)*

28 *2) Reports provided to NB are based on user-specific permits which specify the list of pollutants to be reported. In EMEP reports,*  
29 *emissions are calculated using official EMEP/EEA emission factors.*

30 *3) In the case of NB, some reports might be based (or supplemented with) on individual emission measurements resulting from*  
31 *user-specific industrial processes. Such in-situ data does not always align with EMEP reporting methodology, nor does it cover*  
32 *the same set of pollutants.*

33 *4) For some processes categorized into GNFR E, which are not fully addressed in CED, EMEP emissions are based on population*  
34 *(like domestic solvent use, including fungicide and dry cleaning).*

35 *5) PM10 and PM2.5 emissions from stationary combustion are much lower in EMEP, because the data used in this work do not*  
36 *yet include condensable emissions whereas CED does.*
